# Supplementary material
Source: Research Square preprint supplement (doi:10.21203/rs.3.rs-9086575/v1)
Supplement: Supplementary file 2 [file 1d81ab9dcc09d3104e47e10f.docx]

**Supplementary Table S1. Primer sequences used for quantitative real-time PCR**

| **Gene Symbol** | **Gene Name** | **Primer Sequence (5’ → 3’)** | **Product Size (bp)** |
| --- | --- | --- | --- |
| ****Ppargc1a**** | Peroxisome proliferator-activated receptor gamma coactivator 1-alpha | Forward: TAGCGACCAATCGGAAATC Reverse: GCATCAAATGAGGGCAATC | ~180 |
| ****Sirt1**** | Sirtuin 1 | Forward: TGTGTCATAGGCTAGGTGGTGA Reverse: TTGGTGGCAACTCTGATAAA | ~200 |
| ****Sirt3**** | Sirtuin 3 | Forward: CCCCGACTGCTCATCAAT Reverse: GTCCACCAGCCTTTCCAC | ~170 |
| ****Actb**** | β-Actin | Forward: GTGTTTCCTCGTCCCGTAGA Reverse: CCTCACCCCATTTGATGTTAG | ~180 |

The forward and reverse primer sequences for Ppargc1a, Sirt1, Sirt3, and Actb are listed. Amplicon sizes (product size, bp) were calculated based on the reference gene sequences. Actb was used as the internal reference gene for normalization. All qRT-PCR assays were performed using SYBR Green chemistry.
