# Supplementary material
Source: Research Square preprint supplement (doi:10.21203/rs.3.rs-9086575/v1)
Supplement: Supplementary file 3 [file 5402d6bab6ab8dcdc53deff7.docx]

**Supplementary Table S2. Molecular docking parameters and binding energies of active compounds with predicted target proteins**

| Key genes | Active ingredient | Compound CID | Free  energy  binding（kcal/mol） |
| --- | --- | --- | --- |
| PKM | 1-(4-hydroxybenzyl)-4-methoxy-9,10-dihydrophenanthrene-2,7-diol | 171577 | -9.8 |
| LIMK1 | palmatine | 19009 | -8.4 |

Docking scores were calculated using AutoDock Vina. Lower binding energy values indicate stronger predicted binding affinity.
